# Supplementary material for: Coordinated Hibernation of Transcriptional and Translational Apparatus during Growth Transition of Escherichia coli to Stationary Phase
Source: PubMed Central journal article supplement (PMC6134199; doi:10.1128/msystems.00057-18), 2018-09-11
Supplement: sys004182257sf1.pdf [file sys004182257sf1.pdf]

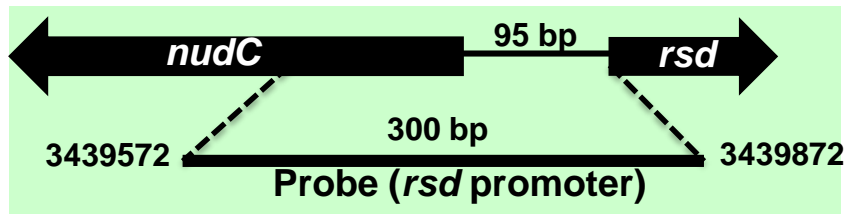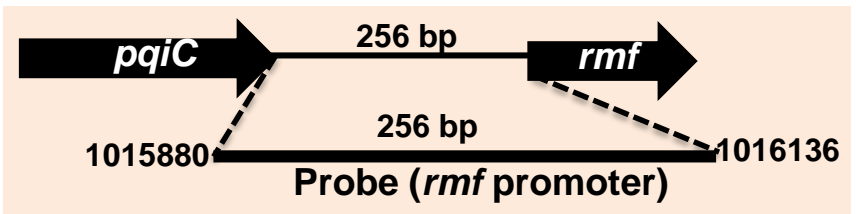

(A) Probe sequence used as the *rsd* promoter (300 bp; genome 3439572-3439872)

```
CGTACCGACC CCATATCGTG ACGCCGCTGC TGTGTACTA ACCAAACAGG TTCCCCCTGC CATTGCCGA
TTTGTAGTGC GCGCTGACCC ACAAGATCGA AATTTGCCG TTCGCCATAT GGCAATTCTC CCTTCGGCAA
CCATAATTTT TGTTTCATGGC TGACGACCCA CCAGCCGTGA TCTAATTTTT CAATTATACG ATCCATAGCT
CTTGCACTAC CTTTGCATCA CTGGCATGTT TAACATGGTT TTTACATTTT TCACTGAGCA GTTTTTGAAT
ACAAACTTGC GGAGTCAATC
```

(B) Probe sequence used as the *rmf* promoter (256 bp; genome 1015880-1016136)

```
ATTATAAAGA TTTGTAAATA TAACCGTCTC CGGTATGTTG CCTGAGGCGG TTTTTTTGTC TCTAACGTGC
GGAAAAATTT GTTCCTCTTC ACATTTTTTG TACAACCGAC ATGCCCGTGT AGCTCACAAA TATGACAGTG
GCGTGAATTT TGCGCATTGA CGGCAGTTAT GATTCGCGGT ATTGCTTAAC TGTGATTGCA CATTAGTAA
TCACTGTTTT CTTTTCCACC AGAAACCAGT ATGAGGGAAA CGAGGC
```

(C) Probe sequence used as a reference (193 bp; genome, 3554400-3554600)

```
TGGCGTAACA GCGTGGTTTG CTGATGAATT CCTATTTTCG CCAGCAGCGG CTCCAGCACC CGGCGGATAA
AATCCGCAGG CGGCGCCGAC GGGTTATCGG TGCCGCCGCT CACTTCAACA CGCGAAGGTC CATCGGCAAA
CCACAGCGCG GGCAGCACCG TTTGCAGCAC CAGCGTACAA CTTCGGCGC TAC
```
