# Supplementary material for: Coordinated Hibernation of Transcriptional and Translational Apparatus during Growth Transition of Escherichia coli to Stationary Phase
Source: PubMed Central journal article supplement (PMC6134199; doi:10.1128/msystems.00057-18), 2018-09-11
Supplement: sys004182257st1.pdf [file sys004182257st1.pdf]

| [A] Characterized TF |        |                                   |           |                                                         |
|----------------------|--------|-----------------------------------|-----------|---------------------------------------------------------|
| TF                   | Y-name | Alternative names                 | Family    | Regulatory function                                     |
| 1                    | AcrR   | YbaH                              | TetR      | Acriflavine resistance regulator                        |
| 2                    | AdiY   |                                   | AraC      | Arginine decarboxylase regulator                        |
| 3                    | AgaR   | YhaW                              | DeoR      | N-Acetylgalactosamine repressor                         |
| 4                    | AlIR   | YbbU                              | IcIR      | Allantoin repressor                                     |
| 5                    | AppY   |                                   | AraC      | Acid phosphatase activator                              |
| 6                    | ArcA   | CpxC,Dye,FexA,Msp,Seg,SfrA        | OmpR      | Anoxic redox regulator                                  |
| 7                    | ArgR   | XerA                              | ArgR      | Arginine repressor                                      |
| 8                    | ArsR   | ArsE                              | ArsR      | Arsenate inducibility regulator                         |
| 9                    | AscG   | Sac                               | Lacl      | Arbutin-salicin-cellibiose regulator                    |
| 10                   | AsnC   |                                   | AsnC      | Asparagine regulator                                    |
| 11                   | AtoC   |                                   | NtrC      | Acetoacetate regulator                                  |
| 12                   | BaeR   |                                   | OmpR      | Bacterial adaptive response regulator                   |
| 13                   | BasR   | PmrA                              | OmpR      | Bacterial adaptive response regulator                   |
| 14                   | BetI   |                                   | TetR      | Betaline inhibitor                                      |
| 15                   | BirA   | BioR,DhbB                         | BirA      | Repressor of biotin operon                              |
| 16                   | CapC   |                                   | CapC      | Activator of cadverine synthesis                        |
| 17                   | CbpA   |                                   | CbpA      | Curved DNA-binding protein A                            |
| 18                   | CIB    | CriR,DpiA,MpdA                    | CIB       | Activator of anaerobic citrate catabolism               |
| 19                   | CpxR   | YiiA                              | OmpR      | Regulator of conjugate pilus expression                 |
| 20                   | Cra    | FruC,FruR,Shl                     | Lacl      | Catabolite repressor activator                          |
| 21                   | CreB   | YjiE                              | OmpR      | Carbon source response regulator                        |
| 22                   | Crp    | Cap,Csm                           | Crp       | cAMP receptor protein                                   |
| 23                   | CsqD   | AgfG,CsgG                         | LuxR      | Regulator of curli-specific genes                       |
| 24                   | CsiR   | YgaE                              | GntR      | Carbon starvation induced regulator                     |
| 25                   | CueR   | YbbI                              | MerR      | Cu efflux regulator                                     |
| 26                   | CusR   | YlcA                              | OmpR      | Cu sensing regulator                                    |
| 27                   | CynR   |                                   | LysR      | Cyanate regulator                                       |
| 28                   | CytR   |                                   | Lacl      | Cytidine regulator                                      |
| 29                   | Dan    | YgiP                              | LysR      | DNA-binding protein under anaerobic conditions          |
| 30                   | DcuR   | YjdG                              | CIB       | Regulator of C4-dicarboxylate metabolism                |
| 31                   | DeoR   | NucR,NupG,Tsx                     | DeoR      | Regulator of cysteine detoxification                    |
| 32                   | DeoT   | YciT                              | DeoR      | DeoR-type regulator                                     |
| 33                   | DhaR   | YcgU                              | NtrC      | Dihydroxyacetone regulator                              |
| 34                   | DiaA   | FtsT                              | Xre       | Division control A                                      |
| 35                   | DifB   | UN                                | UN        | [ IF-2 (translational initiation factor IF2)]           |
| 36                   | DicC   | FtsT                              | DicC      | Division control C                                      |
| 37                   | FadR   | Dec,OleR,ThdB                     | GntR      | Fatty acid degradation regulator                        |
| 38                   | DmlR   | YeaT                              | LysR      | D-Malate degradation regulator                          |
| 39                   | Dps    | PexB,Vtm                          | Dps       | DNA protection during starvation                        |
| 40                   | DsdC   |                                   | LysR      | D-Serine deaminase regulator                            |
| 41                   | EbgR   |                                   | Lacl      | Evolved beta-galactosidase repressor                    |
| 42                   | EmrR   | MprA                              | MarR      | <i>E. coli</i> multidrug resistance regulator           |
| 43                   | EnvR   | YhdK                              | TetR      | Envelope regulator                                      |
| 44                   | EvgA   |                                   | LuxR      | <i>E. coli</i> homolog of <i>Bordetella</i> <i>bvgS</i> |
| 45                   | ExuR   |                                   | GntR      | Exuronate repressor                                     |
| 46                   | FhIA   |                                   | NtrC      | Formate hydrogen lyase activator                        |
| 47                   | Fis    | Nbp                               | Fis       | Factor for inversion stimulation                        |
| 48                   | FriR   | YfhR                              | GntR      | Fructolysine regulator                                  |
| 49                   | FrvR   | YiiH                              | AraC      | Fructose-like transport regulator                       |
| 50                   | FucR   |                                   | DeoR      | Fucose regulator                                        |
| 51                   | Fur    |                                   | Lacl      | Ferric uptake regulator                                 |
| 52                   | GaiR   |                                   | Fur       | Galactose repressor                                     |
| 53                   | GatR   | GatR (full-size GatR)             | DeoR      | Galactitol regulator                                    |
| 54                   | GatR2  | GatR (N-terminal fragment-2)      | DeoR      | Galactitol regulator                                    |
| 55                   | GlpR   |                                   | DeoR      | Glycerol-3-phosphate repressor                          |
| 56                   | QseF   | YfhA                              | GlrR      | Quorum-sensing regulator F                              |
| 57                   | GusR   | UldR                              | TetR      | Glucuronides repressor                                  |
| 58                   | HcaR   | YfhT                              | LysR      | Hydrocinnamic acid regulator                            |
| 59                   | HdfR   | YifA,YifD                         | LysR      | Hns-dependent hldC regulator                            |
| 60                   | HexR   | YebK                              | RpiR      | Hexose regulator                                        |
| 61                   | Hha    |                                   | H-NS      | High hemolysin activity                                 |
| 62                   | HigA   | YgiM                              | T-AT      | Antitoxin of HigB toxin                                 |
| 63                   | HipB   |                                   | T-AT      | Antitoxin of HipA toxin                                 |
| 64                   | Hnr*   | YchL                              | UN        | [ Regulator of RpoS]                                    |
| 65                   | Hns    | BglY,FimG,OzmZ,PilG,TopS,VirR     | H-NS      | Histone-like nucleoid structuring protein               |
| 66                   | HupA   | HU- $\alpha$ ,HU-2                | HU        | Histone-like protein HU-A                               |
| 67                   | HupB   | DepA,DpeA,HU- $\beta$ ,HU-1       | HU        | Histone-like protein HU-B                               |
| 68                   | ArgP   | Can,CanR,IcIA                     | LysR      | Arginine protein                                        |
| 69                   | IcIR   |                                   | IcIR      | Isocitrate lyase regulator                              |
| 70                   | IdnR   | YjgS                              | GntH,GntS | L-Idonate regulator                                     |
| 71                   | IhIA   | Hid,HimA,IHF- $\alpha$            | HU        | Integration host factor A                               |
| 72                   | IhIB   | FimD,HIP,IHF- $\beta$             | HU        | Integration host factor B                               |
| 73                   | IlyY   |                                   | LysR      | Isoleucine-valine regulator                             |
| 74                   | KdpE   |                                   | OmpR      | K <sup>+</sup> -dependent ATPase regulator              |
| 75                   | Lacl   |                                   | Lacl      | Lactose inhibitor                                       |
| 76                   | LctR   | LidR,Lct                          | GntR      | Lactate regulator                                       |
| 77                   | LeuO   |                                   | LysR      | Lactate regulator                                       |
| 78                   | LrhA   | GenR,HexA                         | LysR      | LysR homologue A                                        |
| 79                   | Lrp    | AlsB,LbiA,LivR,LstR,Mbf,OppI,RbIA | AsnC      | Leucine-responsive regulatory protein                   |
| 80                   | LysR   |                                   | LysR      | Lysine regulator                                        |
| 81                   | MaiI   |                                   | Lacl      | Maltose repressor                                       |
| 82                   | MalP   | MalA,Blu                          | UN        | [Maltodextrin phosphorylase]                            |
| 83                   | MarR   | CfbB,InaR,SoxQ                    | MarR      | Multiple antibiotic resistance B                        |
| 84                   | McbR   | YncC                              | GntR      | MqsR-controlled colanic acid and biofilm regulator      |
| 85                   | Mic    | DgsA                              | NagC      | Regulator to make large conolles                        |
| 86                   | MirA   | YehV                              | MerR      | MerR-like regulator of curli production                 |
| 87                   | NadR   | NadI,PnuA,NMN adenylyltransferase | Trigger   | Regulator of NAD synthesis                              |
| 88                   | MntR   | YbiQ                              | DtxR      | Mn <sup>2+</sup> transport regulator                    |
| 89                   | ModE   | ChlD,ModR                         | ModE      | Molybdenum regulator                                    |
| 90                   | NagC   | NagR                              | NagC      | N-Acetylgalactosamine regulator                         |
| 91                   | NarR   | YhcK                              | GntR      | N-Acetylneuraminic acid regulator                       |
| 92                   | NarL   | FrdR,NarR                         | LuxR      | Nitrate/nitrite response regulator NarL                 |
| 93                   | NarP   |                                   | LuxR      | Nitrate/nitrite response regulator NarP                 |
| 94                   | NemR   | YdhM                              | TetR      | N-Ethylmaleimide reductase repressor                    |
| 95                   | NhaR   | YaaB                              | LysR      | Na <sup>+</sup> /H <sup>+</sup> antiporter regulator    |
| 96                   | NorR   | YgaA                              | NtrC      | NO reduction and detoxification regulator               |
| 97                   | NtrC   | GlnG,GlnT                         | NtrC      | Nitrogen regulation C                                   |
| 98                   | OmpR   | Cry,Kmt,OmpB                      | OmpR      | Outer membrane protein regulator                        |
| 99                   | OraA*  | RecX                              | UN        | [RecA inhibitor]                                        |
| 100                  | OxyR   | MomR,Mor                          | LysR      | Oxidative stress regulator                              |
| 101                  | PaaX   | YdbY                              | GntR      | Phenylacetic acid regulator                             |
| 102                  | PdhR   | AceC,GenA                         | GntR      | Pyruvate dehydrogenase complex regulator                |
| 103                  | PepA   | CarP,XerB,Aminopeptidase A/I      | Trigger   | Peptidase regulator                                     |
| 104                  | PerR   |                                   | LysR      | Peroxide response regulator                             |
| 105                  | PhnF   |                                   | GntR      | Phosphonate regulator F                                 |
| 106                  | PhoB*  | PhoRc,PhoT                        | OmpR      | Phosphonate regulator B                                 |
| 107                  | CheB*  |                                   | UN        | [Chemotaxis regulator-Glu methyltransferase]            |
| 108                  | PrpR   | YahP                              | NtrC      | Propionate regulator                                    |
| 109                  | PsjF   | YcjB                              | NtrC      | Phage shock protein F                                   |
| 110                  | PuIA   | PoaA                              | Trigger   | Proline utilization regulator                           |
| 111                  | PuuR   | YjcJ                              | Xre       | Putrescine utilization and transport regulator          |
| 112                  | QseA   | YhcS                              | LysR      | Quorum-sensing regulator A                              |
| 113                  | QseB   | YgiX                              | OmpR      | Quorum-sensing regulator B                              |
| 114                  | QseD   | YjiE                              | LysR      | Quorum-sensing regulator D                              |
| 115                  | RbsR   |                                   | Lacl      | Ribose repressor                                        |
| 116                  | RcsA   | CpsR                              | LuxR      | Regulator capsule synthesis A                           |
| 117                  | RcsB   | ViaA                              | LuxR      | Regulator capsule synthesis B                           |
| 118                  | SfsB   | Nlp                               | SfsA      | Sugar fermentation stimulation regulator B              |
| 119                  | RhaS   | RhaC2                             | AraC      | Rhamnose regulator                                      |
| 120                  | Rob    | CbpB,RobA                         | AraC      | Right origin binding protein                            |

|                    |      |      |               |      |                                                  |
|--------------------|------|------|---------------|------|--------------------------------------------------|
| 121                | RpiR | YjcY | AlsR          | RpiR | Ribosephosphate isomerase regulator              |
| 122                | RstA |      | UrpT          | OmpR | Phage RS-region encoded TF                       |
| 123                | RtcR | YhgB |               | NtrC | RNA terminal phosphate cyclase regulator         |
| 124                | RutR | YcdC |               | TetR | Pyrimidine utilization regulator                 |
| 125                | SrlA |      | UvrX          | LuxR | Suppressor of the cell division inhibitor        |
| 126                | SfsA |      | Sfs,Sfs1      | SfsA | Sugar fermentation stimulation regulator A       |
| 127                | SlyA |      |               | MarR | Hemolytic protein in <i>Salmonella</i>           |
| 128                | SoxR |      | MarC          | MarR | Superoxide response protein R                    |
| 129                | SoxS |      |               | AraC | Superoxide response protein S                    |
| 130                | SrlR |      | GutR          | DeoR | Sorbitol repressor                               |
| 131                | StpA |      | Him3,HnsB,Rsv | H-NS | Suppressor of <i>td</i> phenotype A              |
| 132                | TorR |      |               | OmpR | Regulator of TMAO reduction                      |
| 133                | TreR |      |               | Lacl | Trehalose repressor                              |
| 134                | SlmA | YicB | Ttk           | TetR | Synthetically lethal with a defective Min system |
| 135                | TyrR |      |               | NtrC | Tyrosine repressor                               |
| 136                | UhpA |      |               | LuxR | Regulator of uptake of hexose phosphates         |
| 137                | UlaR | YjfQ |               | DeoR | Utilization of L-ascorbate regulator             |
| 138                | UspA |      |               | UN   | [Universal stress response regulator A]          |
| 139                | UspC |      |               | UN   | [Universal stress response regulator B]          |
| 140                | UvrY | YecB |               | LuxR | Regulator of repair from UV damage               |
| 141                | UxuR |      |               | GntR | Hexuronate regulator                             |
| 142                | ZntR | YhdM |               | MarR | Zinc transporter regulator                       |
| 143                | ZraR |      | HydG          | NtrC | Zinc resistance-associated regulator             |
| 144                | Zur  | YibK |               | Fur  | Zinc uptake regulator                            |
| Total, 144 species |      |      |               |      |                                                  |

#### [B] Uncharacterized TFs

|                   | TF   | Y-name | Alternative names | Family  | Regulatory function                                   |
|-------------------|------|--------|-------------------|---------|-------------------------------------------------------|
| 1                 | YafC |        |                   | LysR    |                                                       |
| 2                 | XynR | Yagl   |                   | IclR    | Regulator of xylonate catabolism                      |
| 3                 | YafA |        |                   | UN      | [c-di-GMP phosphodiesterase]                          |
| 4                 | YahB |        |                   | LysR    |                                                       |
| 5                 | YahD |        |                   | UN      | [Ankyrin repeat protein]                              |
| 6                 | DecR | YbaO   |                   | AsnC    | Regulator of cysteine detoxification                  |
| 7                 | YbbO |        |                   | UN      | [NAPD-dependent aldehyde reductase]                   |
| 8                 | YbdO |        |                   | LysR    |                                                       |
| 9                 | YbeF |        |                   | LysR    |                                                       |
| 10                | CecR | YbiH   |                   | TetR    | Regulator of cefoperazone-chloramphenicol sensitivity |
| 11                | RcdA | YbjK   |                   | TetR    | Regulator of <i>csqD</i>                              |
| 12                | YcaN |        |                   | LysR    |                                                       |
| 13                | ComR | YcfQ   |                   | TetR    | Copper permeability regulator                         |
| 14                | PgrR | YcjZ   |                   | LysR    | Regulator of peptidoglycan recycling                  |
| 15                | Ydci |        |                   | LysR    |                                                       |
| 16                | SutR | YdcN   |                   | Xre     | Regulator of sulfur utilization                       |
| 17                | YdfH |        |                   | GntR    |                                                       |
| 18                | YdhB |        |                   | LysR    |                                                       |
| 19                | NimR | YeaM   |                   | AraC    | Regulator of 2-imidazole sensitivity                  |
| 20                | HprR | YedW   |                   | OmpR    | Hydrogen peroxide response regulator                  |
| 21                | YeeW |        |                   | GntR    |                                                       |
| 22                | BtsR | YehT   |                   | LyTR    | Brenztraubensaure                                     |
| 23                | YaiE |        |                   | LysR    |                                                       |
| 24                | RhmR | YfaX   |                   | IclR    | <i>E. coli</i> PMV-1 regulator                        |
| 25                | YfeR |        |                   | LysR    |                                                       |
| 26                | YfhH |        |                   | RpiR    |                                                       |
| 27                | YfiE |        |                   | LysR    |                                                       |
| 28                | YgaV |        |                   | ArsR    |                                                       |
| 29                | YgeK |        |                   | LuxR    |                                                       |
| 30                | Ygfb |        |                   | UN      | [UPF0149 family protein]                              |
| 31                | Ygfl |        |                   | LysR    |                                                       |
| 32                | YhaJ |        |                   | LysR    |                                                       |
| 33                | YhjC |        |                   | LysR    |                                                       |
| 34                | YiaG |        |                   | Xre     |                                                       |
| 35                | YiaJ |        |                   | IclR    |                                                       |
| 36                | YiaU |        |                   | LysR    |                                                       |
| 37                | YidL |        |                   | AraC    |                                                       |
| 38                | YidP |        |                   | GntR    |                                                       |
| 39                | YidZ |        |                   | LysR    |                                                       |
| 40                | YieP |        |                   | GntR    |                                                       |
| 41                | YihW |        |                   | DeoR    |                                                       |
| 42                | YijO |        |                   | AraC    |                                                       |
| 43                | YidC |        |                   | TetR    |                                                       |
| 44                | BdcR | YigJ   |                   | TetR    | Biofilm dispersal via c-di-GMP                        |
| 45                | YjiM |        |                   | UN      | [2-Hydroxyglutaryl-CoA dehydratase]                   |
| 46                | YiiR |        |                   | Trigger |                                                       |
| 47                | YkgA |        |                   | AraC    |                                                       |
| 48                | RclR | YkgD   |                   | AraC    | Reactive chloride resistance regulator                |
| 49                | YneJ |        |                   | LysR    |                                                       |
| 50                | YnfL |        |                   | LysR    |                                                       |
| 51                | YpdB |        |                   | LyTR    |                                                       |
| 52                | YqhC |        |                   | AraC    |                                                       |
| 53                | YphH |        |                   | NagC    |                                                       |
| 54                | YdcR |        |                   | Trigger |                                                       |
| 55                | YciT | DeoT   |                   | DeoR    | DeoR-type regulator                                   |
| Total, 55 species |      |        |                   |         |                                                       |
