# Supplementary material for: Coordinated Hibernation of Transcriptional and Translational Apparatus during Growth Transition of Escherichia coli to Stationary Phase
Source: PubMed Central journal article supplement (PMC6134199; doi:10.1128/msystems.00057-18), 2018-09-11
Supplement: sys004182257st2.pdf [file sys004182257st2.pdf]

Supplemental Table S2

| Target gene | Primer sequence      |                          |
|-------------|----------------------|--------------------------|
|             | Forward              | Reverse                  |
| <i>rsd</i>  | GCATCTGCTCGTGGCTTAC  | GCTCTGACAAAAATCATCAAGGGC |
| <i>rmf</i>  | GGAACGGGCACATCAACG   | CCCAGCCATTGTGACCTTTG     |
| <i>arcA</i> | AGGCGAATGTTGCGTTGATG | GGGTTGAACGGTTTGGTGATG    |
| <i>mcbR</i> | CGTCTGGTTTCGGTGAATGC | GTAGCGGATCCGATTGATTTG    |
| <i>rcdA</i> | GGAGGCGGTGAACTTTACG  | ACGCCTCCAGTAACAACATC     |
| <i>sdiA</i> | ATGGAGACCGCAGAAGAGG  | GCCACTTTAGGTCGAGTGAATG   |
| <i>slyA</i> | ATGGCGTGCTCTGATAGACC | TTTGCGACTGGTCTGGAGG      |
