# Supplementary material for: Coordinated Hibernation of Transcriptional and Translational Apparatus during Growth Transition of Escherichia coli to Stationary Phase
Source: PubMed Central journal article supplement (PMC6134199; doi:10.1128/msystems.00057-18), 2018-09-11
Supplement: sys004182257st3.pdf [file sys004182257st3.pdf]

Supplemental Table S3

| TF   | No. molecules/cell |                  |
|------|--------------------|------------------|
|      | Exponential phase  | Stationary phase |
| ArcA | 90~100             | 210~240          |
| McbR | 40~50              | 40~50            |
| RcdA | 230~250            | 280~300          |
| SdiA | 720~750            | 840~860          |
| SlyA | 250~280            | 300~330          |
