# Supplementary material for: Coordinated Hibernation of Transcriptional and Translational Apparatus during Growth Transition of Escherichia coli to Stationary Phase
Source: PubMed Central journal article supplement (PMC6134199; doi:10.1128/msystems.00057-18), 2018-09-11
Supplement: sys004182257st4.pdf [file sys004182257st4.pdf]

| Position | Function                                            | Left gene     | D | D | Righ Gene   | Function                                          |
|----------|-----------------------------------------------------|---------------|---|---|-------------|---------------------------------------------------|
| 41946    | carnitine BCCT transporter                          | <i>caiT</i>   | < | > | <i>fixA</i> | flavoprotein for anaerobic carnitine reduction    |
| 121966   | Phe/Tyr/Trp APC transporter                         | <i>aroP</i>   | < | > | <i>pdhR</i> | pyruvate dehydrogenase complex regulator          |
| 141230   | glucose dehydrogenase                               | <i>gcd</i>    | < | > | <i>hpt</i>  | hypoxanthine-Gua phosphoribosyltransferase        |
| 243432   | acyl-CoA dehydrogenase                              | <i>fadE</i>   | < | > | <i>lpcA</i> | D-sedoheptulose 7-phosphate isomerase             |
| 328672   | betaine operon transcriptional repressor            | <i>betI</i>   | < | > | <i>betT</i> | choline BCCT transporter                          |
| 398634   | inner membrane protein                              | <i>yaiY</i>   | < | > | <i>yaiZ</i> | inner membrane protein                            |
| 450964   | cytochrome <i>bo</i> terminal oxidase               | <i>cyoA</i>   | < | < | <i>ampG</i> | muropeptide MFS transporter                       |
| 478570   | inner membrane protein                              | <i>ylaC</i>   | < | < | <i>maa</i>  | maltose acetyltransferase                         |
| 629042   | thioesterase for enterobactin biosynthesis          | <i>entH</i>   | > | > | <i>cstA</i> | peptide transporter                               |
| 651244   | citrate lyase synthetase                            | <i>citC</i>   | < | > | <i>dpiB</i> | DpiBA TCS sensory histidine kinase                |
| 655330   | DcuC dicarboxylate transporter                      | <i>dcuC</i>   | < | > | <i>pagP</i> | lipid palmitoyltransferase                        |
| 728256   | K+ ion accessory transporter                        | <i>kdpF</i>   | < | > | <i>ybfA</i> | predicted protein                                 |
| 741852   | peptide POT Transporter                             | <i>dtpD</i>   | < | > | <i>ybgl</i> | metal-binding hydrolase-oxidase                   |
| 754030   | citrate synthase monomer                            | <i>gltA</i>   | < | > | <i>sdhC</i> | succinate dehydrogenase                           |
| 770038   | alpha-mannosidase                                   | <i>mngB</i>   | > | > | <i>cydA</i> | cytochrome <i>bd</i> terminal oxidase             |
| 840966   | catechol siderophore receptor                       | <i>fiu</i>    | < | < | <i>mcbA</i> | protein involved in colanic acid production       |
| 847534   | glutamine transporter                               | <i>glnH</i>   | < | < | <i>dps</i>  | stationary phase nucleoid iron-binding protein    |
| 953940   | formate FNT transporter                             | <i>focA</i>   | < | < | <i>ycaO</i> | conserved protein                                 |
| 996834   | NAD(P)H-dependent FMN reductase                     | <i>ssuE</i>   | < | > | <i>ycbQ</i> | fimbrial-like adhesin protein                     |
| 1073354  | pyrimidine oxygenase                                | <i>rutA</i>   | < | > | <i>rutR</i> | pyrimidine/purine operon regulator                |
| 1084156  | heme-containing peroxidase/deferrochelatase         | <i>efeB</i>   | > | > | <i>phoH</i> | ATP-binding protein                               |
| 1165242  | conserved protein                                   | <i>ycfP</i>   | > | > | <i>ndh</i>  | NADH:ubiquinone oxidoreductase II                 |
| 1194272  | 23S rRNA pseudouridine 2457 synthase                | <i>rluE</i>   | < | > | <i>icd</i>  | isocitrate dehydrogenase                          |
| 1236756  | conserved protein                                   | <i>ycgB</i>   | < | > | <i>dadA</i> | D-amino acid dehydrogenase                        |
| 1359040  | glutamate-putrescine ligase                         | <i>puuA</i>   | < | > | <i>puuD</i> | glutamyl-aminobutyrate hydrolase                  |
| 1402642  | <i>p</i> -aminobenzoyl-glutamate hydrolase          | <i>abgA</i>   | < | > | <i>abgR</i> | <i>p</i> -aminobenzoyl glutamate operon regulator |
| 1445370  | PEA operon transcriptional activator                | <i>feaR</i>   | < | > | <i>feaB</i> | phenylacetaldehyde dehydrogenase                  |
| 1451850  | oxepin-CoA hydrolase/CoA semialdehyde dehydrogenase | <i>paaZ</i>   | < | > | <i>paaA</i> | ring 1,2-phenylacetyl-CoA epoxidase               |
| 1486146  | conserved protein                                   | <i>ycdF</i>   | > | > | <i>aldA</i> | aldehyde dehydrogenase A                          |
| 1493148  | stress-response transcriptional regulator           | <i>ydcl</i>   | < | > | <i>ycdJ</i> | conserved protein                                 |
| 1561234  | D-Ala-D-Ala dipeptidase                             | <i>dcpX</i>   | < | < | <i>dosP</i> | c-di-GMP phosphodiesterase                        |
| 1684632  | fumarase C monomer                                  | <i>fumC</i>   | < | < | <i>fumA</i> | fumarase A monomer                                |
| 1830072  | acetylornithine delta-aminotransferase              | <i>astC</i>   | < | > | <i>xthA</i> | exonuclease III                                   |
| 1887768  | acyl-CoA synthetase                                 | <i>fadD</i>   | < | < | <i>yeaY</i> | predicted lipoprotein                             |
| 1977670  | IS1 repressor                                       | <i>insA-5</i> | < | > | <i>uspC</i> | universal stress protein                          |
| 2102542  | lipopolysaccharide biosynthesis protein             | <i>wbbK</i>   | < | < | <i>wbbJ</i> | predicted acyl transferase                        |
| 2190388  | fimbrial-like adhesin protein                       | <i>yehD</i>   | < | < | <i>yehE</i> | predicted protein                                 |
| 2276340  | predicted protein                                   | <i>yejG</i>   | < | < | <i>bcr</i>  | multidrug MFS transporter                         |
| 2304934  | malate:quinone oxidoreductase                       | <i>mgo</i>    | < | < | <i>yojI</i> | multidrug ABC superfamily transporter             |
| 2311260  | antisense regulator sRNA for <i>ompF</i> synthesis  | <i>micF</i>   | > | > | <i>rdsD</i> | RcsD phosphotransferase                           |
| 2384870  | predicted peptidase                                 | <i>yfbL</i>   | > | > | <i>yfbM</i> | predicted protein                                 |
| 2403250  | NADH:ubiquinone oxidoreductase                      | <i>nuoA</i>   | < | < | <i>lrhA</i> | type-1 bimbriae operon regulator                  |
| 2425944  | Lys/Arg/ornithine transporter                       | <i>argT</i>   | < | < | <i>ubiX</i> | flavin prenyltransferase                          |
| 2576570  | NADP-dependent malic enzyme                         | <i>maeB</i>   | < | > | <i>talA</i> | transaldolase A                                   |
| 2643032  | nucleoside diphosphate kinase                       | <i>ndk</i>    | < | < | <i>pbpC</i> | peptidoglycan glycosyltransferase                 |
| 2667070  | HcaR transcriptional dual regulator                 | <i>hcaR</i>   | < | > | <i>hcaE</i> | 3-phenylpropionate dioxygenase                    |
| 2723936  | alpha-ketoglutarate MFS transporter                 | <i>kgpT</i>   | > | < | <i>rrfG</i> | <i>rrfG</i> 5S ribosomal RNA                      |
| 2786834  | conserved protein                                   | <i>ygaQ</i>   | > | > | <i>csiD</i> | carbon starvation-induced protein                 |
| 2983750  | predicted acyltransferase                           | <i>yqeF</i>   | < | > | <i>yqeG</i> | hydroxy/aromatic amino acid STP transporter       |
| 3126130  | glycolate oxidase                                   | <i>glcD</i>   | < | > | <i>glcC</i> | glycolate operon regulator                        |
| 3217432  | aerotaxis sensor receptor flavoprotein              | <i>aer</i>    | < | > | <i>ygjG</i> | putrescine aminotransferase                       |
| 3237758  | membrane-bound redox modulator                      | <i>alx</i>    | > | > | <i>sstT</i> | serine/threonine:Na+ symporter                    |
| 3382536  | malate dehydrogenase                                | <i>mdh</i>    | < | > | <i>argR</i> | Arg/His operon regulator                          |
| 3479338  | K+-efflux ancillary protein                         | <i>kefG</i>   | < | > | <i>yheS</i> | ABC superfamily transporter                       |
| 3537960  | transcriptional accessory protein                   | <i>yhgF</i>   | > | > | <i>feoA</i> | ferrous iron transport                            |
| 3590444  | glycerol-3-phosphate transporter                    | <i>ugpB</i>   | < | < | <i>livF</i> | branched chain amino acid ABC transporter         |
| 3656246  | acid-resistance membrane protein                    | <i>hdeD</i>   | > | > | <i>gadE</i> | glutamic acid operon transcriptional activator    |
| 3664032  | GadX transcriptional dual regulator                 | <i>gadX</i>   | < | < | <i>gadA</i> | glutamate decarboxylase A                         |
| 3710232  | oxalatae-formate MFS antiporter                     | <i>yhjX</i>   | < | < | <i>yhjY</i> | putative lipase                                   |
| 3775254  | conserved protein                                   | <i>yibL</i>   | > | > | <i>lldP</i> | dilactate/glycolate:H+ symporter                  |
| 3921034  | ATP-proton motive force interconversion             | <i>atpI</i>   | < | < | <i>rsmG</i> | 16S rRNA G527 methyltransferase                   |
| 4002730  | conserved protein                                   | <i>yigl</i>   | < | > | <i>pldA</i> | phospholipase A1                                  |
| 4029138  | 3-hydroxybutyryl-CoA epimerase                      | <i>fadB</i>   | < | > | <i>pepQ</i> | proline dipeptidase                               |
| 4158830  | pyridine nucleotide transhydrogenase                | <i>sthA</i>   | < | > | <i>fabR</i> | fatty acid biosynthesis operon regulator          |
| 4213436  | homoserine O-succinyltransferase                    | <i>metA</i>   | > | > | <i>aceB</i> | malate synthase A                                 |
| 4285548  | acetyl-CoA synthetase                               | <i>acs</i>    | < | > | <i>nrfA</i> | cytochrome C552                                   |
| 4323268  | phosphonate ABC transporter                         | <i>phnC</i>   | < | < | <i>yjdN</i> | conserved protein                                 |
| 4360056  | CadC transcriptional activator                      | <i>cadC</i>   | < | < | <i>pheU</i> | tRNA-Phe                                          |
| 4364850  | dicarboxylate transporter                           | <i>dcuA</i>   | < | < | <i>aspA</i> | aspartate ammonia-lyase                           |

Total no. binding sites 69  
Total no. regulatory targets 102

Supplemental Table S4B

| Position | Function                                 | Gene        | D | No                           | A12 | D  | Gene        | Function                                     |
|----------|------------------------------------------|-------------|---|------------------------------|-----|----|-------------|----------------------------------------------|
| 34072    | carbamoyl-phosphate synthase             | <i>carB</i> | > |                              |     | >  | <i>caiF</i> | carnitine operon regulator                   |
| 264544   | CP4-6 prophage protein                   | <i>yafX</i> | < |                              |     | <  | <i>ykfF</i> | CP4-6 prophage protein                       |
| 313130   | <i>rpmJ</i> (L36) paralog                | <i>ykgM</i> | < |                              |     | >  | <i>insE</i> | IS3 element protein <i>InsE</i>              |
| 354170   | propionyl-CoA synthetase                 | <i>prpE</i> | > |                              |     | >  | <i>codB</i> | cytosine transporter                         |
| 407866   | conserved protein                        | <i>yaiE</i> | > |                              |     | <  | <i>rdqC</i> | nucleoid-binding RecA regulator              |
| 527330   | predicted protein                        | <i>ybbC</i> | > |                              |     | <  | <i>ybbB</i> | tRNA 2-selenouridine synthase                |
| 558062   | fimbrial-like adhesin protein            | <i>sfmA</i> | > |                              |     | >  | <i>sfmC</i> | pilin chaperone                              |
| 636838   | DNA-binding transcriptional regulator    | <i>ybdO</i> | < |                              |     | <  | <i>dsbG</i> | periplasmic disulfide isomerase              |
| 660856   | DNA-binding transcriptional regulator    | <i>ybeF</i> | < |                              |     | <  | <i>lipB</i> | lipoyl-protein ligase                        |
| 688452   | IS5 transposase and trans-activator      | <i>insH</i> | < |                              |     | <  | <i>Int</i>  | apolipoprotein N-acyltransferase             |
| 707052   | glutamyl-tRNA synthetase                 | <i>glnS</i> | > |                              |     | >  | <i>ybfM</i> | outer membrane porin                         |
| 728772   | predicted protein                        | <i>ybfA</i> | > |                              |     | >  | <i>rhcC</i> | <i>rhcC</i> element core protein RshC        |
| 1084156  | conserved protein                        | <i>efeB</i> | > |                              |     | >  | <i>phoH</i> | nucleoside triphosphate hydrolase            |
| 1200736  | e14 prophage excisionase                 | <i>xisE</i> | < |                              |     | >  | <i>ymfI</i> | e14 prophage protein                         |
| 1314070  | predicted protein                        | <i>yciG</i> | < |                              |     | <  | <i>trpA</i> | tryptophan synthase                          |
| 1332842  | Cys synthesis operon regulator           | <i>cysB</i> | > |                              |     | >  | <i>ymiA</i> | hypothetical protein                         |
| 1342734  | hypothetical protein                     | <i>yciZ</i> | < |                              |     | <  | <i>gmr</i>  | modulator of RNase II stability              |
| 1926870  | protease II                              | <i>ptrB</i> | < |                              |     | <  | <i>yebE</i> | conserved protein                            |
| 2020940  | flagellar biosynthesis protein           | <i>fliQ</i> | > |                              |     | >  | <i>fliR</i> | flagellar export pore protein                |
| 2032840  | ncRNA                                    | <i>rseX</i> | > |                              |     | >  | <i>hchA</i> | Hsp31 molecular chaperone                    |
| 2065942  | IS5 transposase and trans-activator      | <i>insH</i> | < |                              |     | <  | <i>insD</i> | KpLE2 IS2 insertion element transposase      |
| 2105234  | O-antigen polymerase                     | <i>rfc</i>  | < |                              |     | <  | <i>glf</i>  | UDP-galactopyranose mutase                   |
| 2175434  | D-tagatose 1,6-bisphosphate aldolase 2   | <i>gatY</i> | < |                              |     | <  | <i>fbaB</i> | fructose-bisphosphate aldolase class I       |
| 2331448  | predicted protein                        | <i>yfaQ</i> | < |                              |     | <  | <i>yfaT</i> | predicted protein                            |
| 2594748  | conserved protein                        | <i>ypfJ</i> | < |                              |     | <  | <i>purC</i> | ribosylimidazole-succinocarboxamide synthase |
| 2773032  | CP4-57 prophage inner membrane protein   | <i>yfjW</i> | > |                              |     | >  | <i>yfjX</i> | CP4-57 prophage antirestriction protein      |
| 2802570  | ribonucleoside-diphosphate reductase 2   | <i>nrdF</i> | > |                              |     | >  | <i>proV</i> | glycine betaine transporter subunit          |
| 2992436  | pathogenesis-related protein             | <i>ygel</i> | > |                              |     | <  | <i>insD</i> | KpLE2 phage IS2 transposase                  |
| 3110762  | secretion pathway M-type protein         | <i>yghD</i> | < |                              |     | <  | <i>yghG</i> | predicted protein                            |
| 3132050  | nucleoside triphosphate hydrolase domain | <i>yghS</i> | < |                              |     | >  | <i>yghT</i> | ATP-binding NTP hydrolase                    |
| 3144758  | predicted protein                        | <i>yghW</i> | < |                              |     | >  | <i>yghZ</i> | aldo-keto reductase                          |
| 3517370  | shikimate kinase I                       | <i>aroK</i> | < |                              |     | <  | <i>hofQ</i> | predicted fimbrial transporter               |
| 3537860  | radiation-response translation control   | <i>yhgF</i> | > |                              |     | >  | <i>feoA</i> | ferrous iron transporter                     |
| 3597672  | leucine/isoleucine/valine transportert   | <i>livJ</i> | < |                              |     | <  | <i>rpoH</i> | RNA polymerase, sigma 32 (sigma H)           |
| 3664032  | GAD-depend acid resistance regulator     | <i>gadX</i> | > |                              |     | <  | <i>gadA</i> | glutamate decarboxylase A                    |
| 3976654  | acetamino-dideoxy-galactose transferase  | <i>rffT</i> | > |                              |     | >  | <i>wzyE</i> | ECA polysaccharide chain elongation protein  |
| 4148470  | inner membrane protein                   | <i>yijP</i> | < |                              |     | <  | <i>ppc</i>  | phosphoenolpyruvate carboxylase              |
| 4151358  | phosphoenolpyruvate carboxylase          | <i>ppc</i>  | < |                              |     | <  | <i>argE</i> | acetylornithine deacetylase                  |
| 4166466  | Glu tRNA                                 | <i>gltT</i> | > |                              |     | >  | <i>rrlB</i> | 23S ribosomal RNA of <i>rrnB</i> operon      |
| 4207870  | Glu tRNA                                 | <i>gltV</i> | > |                              |     | >  | <i>rrlE</i> | 23S ribosomal RNA of <i>rrnE</i> operon      |
| 4259732  | predicted protein                        | <i>yjbM</i> | > |                              |     | >  | <i>dusA</i> | tRNA-dihydrouridine synthase A               |
| 4267172  | hypothetical protein                     | <i>yjbS</i> | < |                              |     | >  | <i>aphA</i> | acid phosphatase/phosphotransferase          |
|          |                                          |             |   | Total no. binding sites      | 27  | 26 |             |                                              |
|          |                                          |             |   | Total no. regulatory targets | 38  | 37 |             |                                              |

| Position | Function                                         | Gene           | D | D | Gene          | Function                                   |
|----------|--------------------------------------------------|----------------|---|---|---------------|--------------------------------------------|
| 19830    | InsAB transposase                                | <i>insAB-1</i> | < | < | <i>insB-1</i> | IS1 protein InsB                           |
| 384316   | conserved protein                                | <i>yaiS</i>    | < | > | <i>tauA</i>   | taurine ABC transporter                    |
| 582848   | DLP12 prophage protein                           | <i>tfaX</i>    | > | > | <i>appY</i>   | DNA binding transcriptional activator      |
| 584962   | outer membrane protease VII                      | <i>ompT</i>    | < | < | <i>envY</i>   | EnvY transcriptional activator             |
| 886556   | predicted transporter                            | <i>ybjJ</i>    | < | > | <i>rcdA</i>   | DNA-binding transcriptional regulator      |
| 1020144  | SOS cell division inhibitor                      | <i>sulA</i>    | < | > | <i>sxy</i>    | transcriptional coactivator for CRP        |
| 1102554  | transcriptional dual regulator                   | <i>csqD</i>    | < | > | <i>csqB</i>   | curlin, minor subunit precursor            |
| 1104940  | predicted protein                                | <i>ymdA</i>    | > | > | <i>ymdB</i>   | regulator of RNase III activity            |
| 1209454  | e14 site-specific DNA recombinase                | <i>pinE</i>    | > | > | <i>mcrA</i>   | restriction at 5-methylcytosine residues   |
| 1214962  | blue light-responsive regulator of YcgE          | <i>ycgF</i>    | < | > | <i>ycgZ</i>   | predicted protein                          |
| 1321242  | <i>trp</i> operon leader peptide                 | <i>trpL</i>    | < | > | <i>yciV</i>   | conserved protein                          |
| 1622770  | stress response protein                          | <i>ydel</i>    | < | > | <i>ydeJ</i>   | conserved protein                          |
| 1631666  | Qin prophage transcriptional regulator           | <i>ydfK</i>    | > | > | <i>pinQ</i>   | Qin prophage site-specific recombinase     |
| 1638666  | Qin prophage S lysis protein                     | <i>essQ</i>    | < | < | <i>cspB</i>   | Qin cold shock transcriptional regulator   |
| 1669136  | MFS transporter                                  | <i>ynfM</i>    | > | > | <i>asr</i>    | acid shock protein                         |
| 1669932  | small membrane protein                           | <i>ydqU</i>    | > | > | <i>ydqD</i>   | predicted peptidase                        |
| 1976556  | InsAB' transposase                               | <i>insAB-5</i> | < | < | <i>insB-5</i> | IS1 protein                                |
| 2066688  | IS5 transposase and trans-activator              | <i>insH-6</i>  | < | > | <i>yoeA</i>   | CP4-44 disrupted hemin or colicin receptor |
| 2264250  | NAD-dependent dehydrogenase                      | <i>yeiP</i>    | > | > | <i>yeiQ</i>   | predicted NAD-dependent dehydrogenase      |
| 2311454  | antisense RNA against <i>OmpF</i>                | <i>micF</i>    | > | > | <i>rcsD</i>   | RcsD phosphotransferase                    |
| 2439732  | $\beta$ -ketoacyl-[acyl carrier prot] synthase I | <i>fabB</i>    | < | > | <i>mnmC</i>   | methylaminomethyl-thioU methyltransferase  |
| 2797030  | nucleoid-protein with RNA chaperone activity     | <i>stpA</i>    | < | > | <i>ygaW</i>   | predicted inner membrane protein           |
| 2989270  | predicted protein                                | <i>ygeF</i>    | > | > | <i>ygeG</i>   | predicted chaperone                        |
| 3651858  | uncharacterized protein (pseudogene)             | <i>yhiS_2</i>  | < | > | <i>slp</i>    | starvation lipoprotein                     |
| 3766966  | conserved protein                                | <i>yibG</i>    | > | > | <i>yibV</i>   | hypothetical protein                       |
| 4042234  | protein disulfide oxidoreductase                 | <i>dsbA</i>    | > | > | <i>yihF</i>   | putative GTP-binding protein               |
| 4328334  | conserved protein                                | <i>yjcZ</i>    | > | > | <i>proP</i>   | osmolyte:H <sup>+</sup> symporter          |
| 4336030  | AdiY transcriptional activator                   | <i>adiY</i>    | < | < | <i>adiA</i>   | arginine decarboxylase                     |
| 4477770  | predicted acetyltransferase                      | <i>yjgM</i>    | < | > | <i>yjgN</i>   | conserved inner membrane protein           |
| 4502056  | IS1 predicted transposase                        | <i>insG</i>    | < | > | <i>yjhB</i>   | MFS transporter                            |
| 4538758  | N-acetylneuraminic acid OM channel               | <i>nanC</i>    | < | > | <i>fimB</i>   | regulator for <i>fimA</i>                  |

|                              |    |
|------------------------------|----|
| Total no. binding sites      | 31 |
| Total no. regulatory targets | 44 |

Supplemental Table S4D

| Position | Function                                         | Left gene   | D | N | A | F | K | D | Right gene  | Function                                              |
|----------|--------------------------------------------------|-------------|---|---|---|---|---|---|-------------|-------------------------------------------------------|
| 11936    | predicted protein                                | <i>yaal</i> | < |   |   |   |   | > | <i>dnaK</i> | chaperone Hsp70, co-chaperone with DnaJ               |
| 29360    | dihydrodipicolinate reductase                    | <i>dapB</i> | > |   |   |   |   | > | <i>carA</i> | carbamoyl P synthetase, Gln amidotransferase          |
| 84246    | <i>leu</i> operon leader peptide                 | <i>leuL</i> | < |   |   |   |   | > | <i>leuO</i> | DNA-binding transcriptional activator                 |
| 85462    | Leu regulon transcriptional regulator            | <i>leuO</i> | > |   |   |   |   | > | <i>ilvI</i> | acetolactate synthase III                             |
| 89272    | carbon metabolism transcriptional regulator      | <i>cra</i>  | > |   |   |   |   | > | <i>mraZ</i> | conserved protein                                     |
| 121872   | aromatic amino acid transporter                  | <i>aroP</i> | < |   |   |   |   | > | <i>pdhR</i> | pyruvate dehydrogenase complex regulator              |
| 312342   | <i>rpmJ</i> (L36) paralog                        | <i>ykqM</i> | < |   |   |   |   | > | <i>insE</i> | IS3 element protein InsE                              |
| 317836   | predicted protein                                | <i>ykqL</i> | < |   |   |   |   | < | <i>ykqC</i> | oxidoreductase FAD/NAD(P)-binding domain              |
| 440564   | exonuclease VII small subunit                    | <i>xseB</i> | < |   |   |   |   | > | <i>thil</i> | sulfurtransferase for thiamine/4-thiouridinesynthesis |
| 454130   | PBP regulator lactamase transcription            | <i>bolA</i> | > |   |   |   |   | > | <i>tig</i>  | peptidyl-prolyl cis/trans isomerase (trigger factor)  |
| 568022   | DLP12 prophage multidrug resistance protein      | <i>emrE</i> | > |   |   |   |   | > | <i>ybck</i> | DLP12 prophage recombinase                            |
| 576232   | IS5 transposase and trans-activator              | <i>insH</i> | < |   |   |   |   | > | <i>essD</i> | DLP12 prophage phage lysis protein                    |
| 651244   | citrate lyase synthetase                         | <i>citC</i> | < |   |   |   |   | > | <i>dpiB</i> | CitBA citrate operon TCS histidine kinase             |
| 655330   | anaerobic C4-dicarboxylate transport             | <i>dcuC</i> | < |   |   |   |   | > | <i>paqP</i> | palmitoyl transferase for Lipid A                     |
| 660672   | DNA-binding transcriptional regulator            | <i>ybeF</i> | < |   |   |   |   | < | <i>lipB</i> | lipoyl-protein ligase                                 |
| 702948   | glucosamine-6-phosphate deaminase                | <i>nagB</i> | < |   |   |   |   | > | <i>nagE</i> | N-acetyl glucosamine specific PTS enzyme II           |
| 735540   | predicted protein                                | <i>ybfC</i> | > |   |   |   |   | > | <i>ybfQ</i> | predicted transposase                                 |
| 735932   | transposase                                      | <i>ybfQ</i> | > |   |   |   |   | > | <i>ybfD</i> | conserved protein                                     |
| 770460   | alpha-mannosidase                                | <i>mnqB</i> | > |   |   |   |   | > | <i>cydA</i> | cytochrome d terminal oxidase, subunit I              |
| 832234   | conserved protein                                | <i>ybiA</i> | < |   |   |   |   | > | <i>dinG</i> | ATP-dependent DNA helicase                            |
| 840966   | iron outer membrane transporter                  | <i>fiu</i>  | < |   |   |   |   | < | <i>mcbA</i> | predicted protein                                     |
| 849470   | threonine and homoserine efflux system           | <i>rhtA</i> | < |   |   |   |   | > | <i>ompX</i> | outer membrane protein                                |
| 953940   | formate transporter                              | <i>focA</i> | < |   |   |   |   | < | <i>ycaO</i> | conserved protein                                     |
| 986332   | outer membrane porin 1a                          | <i>ompF</i> | < |   |   |   |   | < | <i>asnS</i> | asparaginyl tRNA synthetase                           |
| 996834   | NAD(P)H-dependent FMN reductase                  | <i>ssuE</i> | < |   |   |   |   | > | <i>ybcQ</i> | fimbrial-like adhesin protein                         |
| 1064672  | predicted protein                                | <i>yccE</i> | > |   |   |   |   | > | <i>agp</i>  | glucose-1-phosphatase/inositol phosphatase            |
| 1091836  | outer membrane protein                           | <i>pgaA</i> | < |   |   |   |   | > | <i>ycdT</i> | predicted diguanylate cyclase                         |
| 1120372  | predicted protein                                | <i>bssS</i> | < |   |   |   |   | < | <i>dinI</i> | DNA damage-inducible protein I                        |
| 1214838  | FAD-binding phosphodiesterase                    | <i>ycgF</i> | < |   |   |   |   | > | <i>ycqZ</i> | predicted protein                                     |
| 1271162  | calcium/sodium:proton antiporter                 | <i>chaA</i> | < |   |   |   |   | > | <i>chaB</i> | predicted cation regulator                            |
| 1314248  | predicted protein                                | <i>yciG</i> | < |   |   |   |   | < | <i>trpA</i> | tryptophan synthase                                   |
| 1402642  | aminobenzoate-glutamate utilization protein      | <i>abgA</i> | < |   |   |   |   | > | <i>abgR</i> | aminoenzoyl-glutamate operon regulator                |
| 1431862  | Rac prophage site-specific recombinase           | <i>pinR</i> | < |   |   |   |   | < | <i>ynaE</i> | Rac prophage transcriptional regulator                |
| 1544148  | predicted protein                                | <i>yddJ</i> | < |   |   |   |   | < | <i>yddG</i> | methyl viologen efflux pump                           |
| 1570156  | glutamate decarboxylase B, PLP-dependent         | <i>gadB</i> | < |   |   |   |   | < | <i>pqqL</i> | predicted peptidase                                   |
| 1580646  | conserved protein                                | <i>ydeN</i> | < |   |   |   |   | < | <i>ydeO</i> | acid response Gad cascade regulator                   |
| 1585730  | fimbrial-like adhesin protein                    | <i>ydeQ</i> | < |   |   |   |   | < | <i>ydeR</i> | fimbrial-like adhesin protein                         |
| 1621964  | conserved protein                                | <i>ydeH</i> | < |   |   |   |   | < | <i>ydeI</i> | conserved protein                                     |
| 1622654  | conserved protein                                | <i>ydeI</i> | < |   |   |   |   | > | <i>ydeJ</i> | conserved protein                                     |
| 1631434  | Qin prophage acid-response regulator             | <i>ydkK</i> | > |   |   |   |   | > | <i>pinQ</i> | Qin prophage site-specific recombinase                |
| 1653764  | conserved inner membrane protein                 | <i>ynfA</i> | < |   |   |   |   | > | <i>ynfB</i> | predicted protein                                     |
| 1702472  | predicted oxidoreductase                         | <i>ydgJ</i> | < |   |   |   |   | > | <i>blr</i>  | beta-lactam resistance membrane protein               |
| 1719066  | hemolytic protein-like transcriptional regulator | <i>slvA</i> | < |   |   |   |   | > | <i>ydhI</i> | inner membrane protein                                |
| 1752832  | 4Fe-4S ferridoxin-type protein                   | <i>ydhY</i> | < |   |   |   |   | < | <i>ydhZ</i> | predicted protein                                     |
| 1755332  | pyruvate kinase I                                | <i>pykF</i> | < |   |   |   |   | > | <i>lpp</i>  | murein lipoprotein                                    |
| 1801348  | threonyl-tRNA synthetase                         | <i>thrS</i> | < |   |   |   |   | > | <i>yniD</i> | predicted protein                                     |
| 1804342  | conserved protein                                | <i>ydiY</i> | < |   |   |   |   | > | <i>pfkB</i> | 6-phosphofructokinase II                              |
| 1811260  | predicted protein                                | <i>ydiO</i> | < |   |   |   |   | < | <i>cedA</i> | cell division modulator                               |
| 1821336  | Gln-dependent NAD synthase                       | <i>nadE</i> | > |   |   |   |   | > | <i>cho</i>  | endonuclease of nucleotide excision repair            |
| 1823762  | beta-ketoacyl-[acyl carrier protein] synthase I  | <i>spy</i>  | < |   |   |   |   | < | <i>astE</i> | succinylglutamate desuccinylase                       |
| 1842870  | inner membrane protein                           | <i>ynjI</i> | < |   |   |   |   | < | <i>topB</i> | DNA topoisomerase III                                 |
| 1906068  | predicted protein                                | <i>yobF</i> | < |   |   |   |   | < | <i>yebO</i> | predicted protein                                     |
| 1944202  | RuvABC resolvosome                               | <i>ruvA</i> | < |   |   |   |   | > | <i>yebB</i> | predicted protein                                     |
| 2033552  | ncRNA                                            | <i>rseX</i> | < |   |   |   |   | > | <i>hchA</i> | Hsp31 molecular chaperone                             |
| 2051334  | adhesin                                          | <i>yeeJ</i> | > |   |   |   |   | > | <i>shiA</i> | shikimate transporter                                 |
| 2066456  | IS5 transposase and trans-activator              | <i>insH</i> | < |   |   |   |   | < | <i>insD</i> | KpLE2 IS2 transposase InsAB                           |
| 2310860  | outer membrane porin C                           | <i>ompC</i> | < |   |   |   |   | > | <i>micF</i> | ncRNA                                                 |
| 2311260  | ncRNA                                            | <i>micF</i> | > |   |   |   |   | > | <i>rcsD</i> | RcbBC phosphotransfer intermediate protein            |
| 2347662  | conserved protein                                | <i>inaA</i> | < |   |   |   |   | < | <i>glpQ</i> | glycerophosphodiester phosphodiesterase               |
| 2363766  | conserved protein                                | <i>ais</i>  | < |   |   |   |   | > | <i>arnB</i> | Uri-5' (pentapranosyl-uloose PPI) aminotransferase    |
| 2467134  | CPS-53 bactoprenol glucosyl transferase          | <i>yfjH</i> | < |   |   |   |   | > | <i>yfdI</i> | CPS-53 (KpLE1) prophage IM protein                    |
| 2475638  | D-Ser operon transcriptional regulator           | <i>dsdC</i> | < |   |   |   |   | > | <i>dsdX</i> | predicted transporter                                 |
| 2491366  | formyl-CoA transferase,                          | <i>frc</i>  | < |   |   |   |   | < | <i>yfdX</i> | predicted protein                                     |
| 2560064  | CPZ-55 prophage protein                          | <i>yffN</i> | > |   |   |   |   | > | <i>yffO</i> | CPZ-55 prophage protein                               |
| 2561242  | CPZ-55 prophage protein                          | <i>yffP</i> | > |   |   |   |   | > | <i>yffQ</i> | CPZ-55 prophage protein                               |
| 2627762  | predicted protein                                | <i>yfgG</i> | > |   |   |   |   | > | <i>yfgH</i> | outer membrane lipoprotein                            |
| 2714546  | pyruvate formate lyase subunit                   | <i>yfiD</i> | < |   |   |   |   | > | <i>ung</i>  | uracil-DNA-glycosylase                                |
| 2729552  | 16S ribosomal RNA of <i>rmG</i> operon           | <i>rrsG</i> | < |   |   |   |   | < | <i>clpB</i> | protein disaggregation chaperone                      |
| 2773032  | CP4-57 prophage inner membrane protein           | <i>yfiW</i> | > |   |   |   |   | > | <i>yfiX</i> | CP4-57 prophage antirestriction protein               |
| 2781672  | adhesin-like autotransporter                     | <i>ypjA</i> | < |   |   |   |   | < | <i>ileY</i> | Ile tRNA                                              |
| 2784564  | Ile tRNA                                         | <i>ileY</i> | < |   |   |   |   | > | <i>csiD</i> | predicted protein                                     |
| 2796642  | nucleoid-associated H-NS-like regulator          | <i>stpA</i> | < |   |   |   |   | > | <i>ygaW</i> | inner membrane protein                                |
| 2802658  | ribonucleoside-diphosphate reductase 2           | <i>nrdF</i> | < |   |   |   |   | > | <i>proV</i> | glycine betaine transporter                           |
| 2816770  | Ser tRNA                                         | <i>serV</i> | < |   |   |   |   | < | <i>csrA</i> | carbon source metabolism regulator                    |
| 2882356  | predicted protein                                | <i>ygcl</i> | < |   |   |   |   | < | <i>ycgB</i> | DEAD box family protein                               |
| 2925954  | conserved protein                                | <i>ygdH</i> | > |   |   |   |   | > | <i>sdaC</i> | serine transporter                                    |
| 2931960  | L-fucose-1-phosphate aldolase                    | <i>fucA</i> | < |   |   |   |   | > | <i>fucP</i> | L-fucose transporter                                  |
| 2945334  | murein transglycosylase A                        | <i>mltA</i> | < |   |   |   |   | > | <i>metZ</i> | Met tRNA                                              |
| 2985254  | predicted transporter                            | <i>yqeG</i> | > |   |   |   |   | > | <i>yqeH</i> | conserved protein                                     |
| 3004034  | A12-induced transcriptional regulator            | <i>ygeV</i> | < |   |   |   |   | > | <i>ygeW</i> | conserved protein                                     |
| 3077446  | mannitol-specific PTS enzyme IIA                 | <i>cmtB</i> | < |   |   |   |   | < | <i>tktA</i> | transketolase 1, thiamin-binding                      |
| 3117230  | inner membrane lipoprotein                       | <i>yghJ</i> | < |   |   |   |   | < | <i>glcA</i> | glycolate transporter                                 |
| 3134540  | phosphate transporter                            | <i>pitB</i> | < |   |   |   |   | < | <i>gsp</i>  | glutathionylspermidine amidase                        |
| 3144338  | hydrogenase 2                                    | <i>hybO</i> | < |   |   |   |   | < | <i>yghW</i> | predicted protein                                     |
| 3170266  | inner membrane protein                           | <i>ygiZ</i> | < |   |   |   |   | > | <i>mdaB</i> | NADPH quinone reductase                               |

|         |                                                        |             |   |  |  |  |  |  |   |             |                                                        |
|---------|--------------------------------------------------------|-------------|---|--|--|--|--|--|---|-------------|--------------------------------------------------------|
| 3204358 | anaerobic growth nucleoid protein                      | <i>dan</i>  | < |  |  |  |  |  | > | <i>ttdA</i> | L-tartrate dehydratase                                 |
| 3214730 | siderophore interacting protein                        | <i>yqjH</i> | < |  |  |  |  |  | > | <i>yqjI</i> | transcriptional regulator                              |
| 3217358 | aerotaxis signal transducer sensory                    | <i>aer</i>  | < |  |  |  |  |  | > | <i>ygjG</i> | putrescine:2-oxoglutaric acid aminotransferase         |
| 3265162 | Thr/Ser regulonI regulator                             | <i>tdcA</i> | < |  |  |  |  |  | > | <i>tdcR</i> | Thr/Ser regulonI regulator                             |
| 3279834 | N-acetylgalactosamine-specific PTS                     | <i>agaV</i> | > |  |  |  |  |  | > | <i>agaS</i> | tagatose-6-phosphate ketose/aldose isomerase           |
| 3359040 | glutamate synthase_4Fe-4S proteint                     | <i>gltD</i> | > |  |  |  |  |  | > | <i>gltF</i> | periplasmic protein                                    |
| 3427154 | 16S ribosomal RNA of <i>rrnD</i> operon                | <i>rrsD</i> | < |  |  |  |  |  | > | <i>rrdA</i> | conserved protein                                      |
| 3316172 | conserved protein                                      | <i>yhbC</i> | < |  |  |  |  |  | < | <i>metY</i> | Met tRNA                                               |
| 3348572 | isoprenoid biosynthesis protein                        | <i>elbB</i> | < |  |  |  |  |  | > | <i>ryhA</i> | ncRNA                                                  |
| 3375554 | stringent starvation protein A                         | <i>sspA</i> | < |  |  |  |  |  | < | <i>rpsI</i> | 30S ribosomal subunit protein S9                       |
| 3411666 | drug-efflux regulon transcriptional regulator          | <i>envR</i> | < |  |  |  |  |  | > | <i>acrE</i> | cytoplasmic membrane lipoprotein                       |
| 3427154 | 16S ribosomal RNA of <i>rrnD</i> operon                | <i>rrsD</i> | < |  |  |  |  |  | > | <i>rrdA</i> | conserved protein                                      |
| 3530664 | inner membrane protein                                 | <i>yhgE</i> | < |  |  |  |  |  | > | <i>pck</i>  | phosphoenolpyruvate carboxykinase                      |
| 3550864 | maltodextrin phosphorylase                             | <i>malP</i> | < |  |  |  |  |  | > | <i>malT</i> | maltotriose-ATP-binding transcription regulator        |
| 3581134 | conserved protein                                      | <i>yhhZ</i> | > |  |  |  |  |  | > | <i>insA</i> | KpLE2 phage-like element; IS1 repressor InsA           |
| 3595724 | leucine transporter subunit                            | <i>livK</i> | < |  |  |  |  |  | > | <i>yhhK</i> | conserved protein                                      |
| 3597838 | leucine/isoleucine/valine transporter                  | <i>livJ</i> | < |  |  |  |  |  | < | <i>rpoH</i> | RNA polymerase sigma 32 (sigma H) factor               |
| 3622268 | predicted protein                                      | <i>yhhH</i> | > |  |  |  |  |  | > | <i>yhhI</i> | predicted transposase                                  |
| 3632570 | predicted protein                                      | <i>yhiJ</i> | < |  |  |  |  |  | > | <i>yhiM</i> | inner membrane protein                                 |
| 3670238 | YhjAB TCS response regulator                           | <i>yhiB</i> | < |  |  |  |  |  | > | <i>yhiC</i> | DNA-binding transcriptional regulator                  |
| 3706050 | dipeptide transporter                                  | <i>dppA</i> | < |  |  |  |  |  | < | <i>proK</i> | Pro tRNA                                               |
| 3728944 | D-xylose isomerase                                     | <i>xylA</i> | < |  |  |  |  |  | > | <i>xylF</i> | D-xylose transporter subunit                           |
| 3802172 | UDP-D-galactose:LPS-galactosyltransferase              | <i>rfaB</i> | < |  |  |  |  |  | < | <i>rfaS</i> | LP core biosynthesis protein                           |
| 3802986 | UDP-D-galactose:LPS-galactosyltransferase              | <i>rfaI</i> | < |  |  |  |  |  | < | <i>rfaB</i> | UDP-D-galactose:LP-1,6-D-galactosyltransferase         |
| 3803124 | LPS core biosynthesis protein                          | <i>rfaS</i> | < |  |  |  |  |  | < | <i>rfaP</i> | LP phosphorylates core heptose kinase                  |
| 3806372 | LPS core biosynthesis protein                          | <i>rfaQ</i> | < |  |  |  |  |  | > | <i>waaA</i> | 3-deoxy-D-manno-octulosonic-acid transferase           |
| 3834134 | predicted transporter                                  | <i>yicJ</i> | < |  |  |  |  |  | > | <i>selC</i> | Sec tRNA                                               |
| 3841848 | xanthine/uracil permase                                | <i>yicO</i> | < |  |  |  |  |  | > | <i>ade</i>  | cryptic adenine deaminase                              |
| 3886640 | tryptophanase leader peptide                           | <i>tnaC</i> | > |  |  |  |  |  | > | <i>tnaA</i> | tryptophanase/L-cysteine desulfhydrase                 |
| 3904730 | <i>bgl</i> operon transcriptional antiterminator       | <i>bglG</i> | < |  |  |  |  |  | < | <i>phoU</i> | PhoRB two-component regulator                          |
| 3920768 | membrane-bound ATP synthase                            | <i>atpI</i> | < |  |  |  |  |  | < | <i>gidB</i> | SAM-dependent methyltransferase                        |
| 3929268 | transcriptional regulator: sigma-54 activator          | <i>ravA</i> | < |  |  |  |  |  | > | <i>kup</i>  | potassium transporter                                  |
| 4044850 | predicted endonuclease                                 | <i>yihG</i> | < |  |  |  |  |  | > | <i>polA</i> | DNA polymerase I                                       |
| 4076772 | predicted acetyltransferase                            | <i>yiiD</i> | > |  |  |  |  |  | > | <i>yiiE</i> | DNA-depemdemt transcriptional regulator                |
| 4233870 | glucosephosphate isomerase                             | <i>pgi</i>  | > |  |  |  |  |  | > | <i>yjbE</i> | predicted protein                                      |
| 4249834 | maltose regulon periplasmic protein                    | <i>malM</i> | > |  |  |  |  |  | > | <i>ubiC</i> | chorismate pyruvate lyase                              |
| 4267058 | hypothetical protein                                   | <i>yjbS</i> | < |  |  |  |  |  | > | <i>aphA</i> | acid phosphatase/phosphotransferase                    |
| 4292346 | heme lyase (NrfEFG)                                    | <i>nrfG</i> | > |  |  |  |  |  | > | <i>gltP</i> | glutamate/aspartate:proton symporter                   |
| 4324976 | conserved protein                                      | <i>yjdM</i> | < |  |  |  |  |  | > | <i>yjdA</i> | nucleoside triphosphate hydrolase kinase               |
| 4402644 | inner membrane protein                                 | <i>yjeT</i> | > |  |  |  |  |  | > | <i>purA</i> | adenylosuccinate synthetase                            |
| 4539836 | Tyr recombinase/inversion <i>fimA</i> on/off regulator | <i>fimB</i> | > |  |  |  |  |  | > | <i>fimE</i> | Tyr recombinase/inversion <i>fimA</i> on/off regulator |
| 4554598 | predicted protein                                      | <i>yjiC</i> | < |  |  |  |  |  | > | <i>yjiD</i> | DNA replication/recombination/repair protein           |
| 4589632 | inner membrane protein                                 | <i>yjiY</i> | < |  |  |  |  |  | > | <i>tsr</i>  | methyl-accepting chemotaxis Ser sensor                 |
| 4601072 | inner membrane protein                                 | <i>yjiP</i> | < |  |  |  |  |  | > | <i>yjiQ</i> | DNA-binding transcriptional regulator                  |

|                              |    |    |    |    |
|------------------------------|----|----|----|----|
| Total no. binding sites      | 48 | 77 | 67 | 57 |
| Total no. regulatory targets | 70 | ## | 97 | 78 |

| Function                                           | Gene        | D  | D | Gene        | Function                                             |
|----------------------------------------------------|-------------|----|---|-------------|------------------------------------------------------|
| leu operon leader peptide                          | <i>leuL</i> | <  | > | <i>leuO</i> | <i>leu</i> regulon regulator                         |
| Asp tRNA                                           | <i>aspV</i> | >  | > | <i>yafT</i> | predicted aminopeptidase                             |
| predicted protein                                  | <i>yaiA</i> | >  | > | <i>aroM</i> | conserved protein                                    |
| predicted protein                                  | <i>tomB</i> | <  | < | <i>acrB</i> | multidrug efflux system protein                      |
| IS5 transposase and trans-activator                | <i>insH</i> | <  | > | <i>essD</i> | DLP12 prophage phage lysis protein                   |
| predicted protein                                  | <i>ybfA</i> | >  | > | <i>rhcC</i> | <i>rhcC</i> element core protein RshC                |
| citrate synthase                                   | <i>gltA</i> | <  | > | <i>sdhC</i> | succinate dehydrogenase                              |
| alpha-mannosidase                                  | <i>mngB</i> | >  | > | <i>cydA</i> | cytochrome <i>d</i> terminal oxidase                 |
| periplasmic protein                                | <i>toiB</i> | >  | > | <i>pal</i>  | peptidoglycan-associated OM lipoprotein              |
| Rossmann-fold domain transferase                   | <i>ybhK</i> | <  | > | <i>moaA</i> | molybdopterin biosynthesis protein A                 |
| aquaporin                                          | <i>aqpZ</i> | <  | > | <i>ybjD</i> | nucleoside triphosphate hydrolase                    |
| formate transporter                                | <i>focA</i> | <  | < | <i>ycaO</i> | conserved protein                                    |
| ferric-rhodotorulic acid OM transporter            | <i>fhuH</i> | <  | > | <i>hinT</i> | purine nucleoside phosphoramidase                    |
| hemolysin E                                        | <i>hlyE</i> | <  | > | <i>umuD</i> | DNA polymerase V                                     |
| ABC superfamily MD transporter                     | <i>yddA</i> | <  | < | <i>ydeM</i> | conserved protein                                    |
| predicted lipoprotein                              | <i>ydeK</i> | <  | < | <i>lsrK</i> | autoinducer-2 (AI-2) kinase                          |
| predicted protein                                  | <i>ynfD</i> | >  | > | <i>ynfE</i> | oxidoreductase                                       |
| autogeneous regulation                             | <i>slyA</i> | <  | > | <i>ydhl</i> | inner membrane protein                               |
| predicted transporter                              | <i>ydhC</i> | >  | > | <i>cfa</i>  | cyclopropane fatty acyl phospholipid synthase        |
| threonyl-tRNA synthetase                           | <i>thrS</i> | <  | > | <i>yniD</i> | predicted protein                                    |
| predicted protein                                  | <i>yoal</i> | <  | > | <i>yeaL</i> | conserved inner membrane protein                     |
| conserved protein                                  | <i>yoaB</i> | >  | > | <i>yoaC</i> | predicted protein                                    |
| predicted protein                                  | <i>yobF</i> | <  | < | <i>yebO</i> | predicted protein                                    |
| flagellar regulon transcriptional regulator        | <i>flhD</i> | <  | < | <i>insB</i> | IS1 transposase InsAB'                               |
| cell division control transcriptional activator    | <i>sdiA</i> | <  | < | <i>yecC</i> | ABC superfamily transporter                          |
| IS5 transposase and trans-activator                | <i>insH</i> | <  | < | <i>insD</i> | KpLE2 IS2 transposase InsAB'                         |
| predicted protein                                  | <i>yegR</i> | <  | > | <i>yegS</i> | phosphatidylglycerol kinase                          |
| ncRNA                                              | <i>micF</i> | >  | > | <i>rcsD</i> | RcsBC TCS phosphotransfer intermediate               |
| adhesin                                            | <i>yfaL</i> | <  | < | <i>ypaB</i> | hypothetical protein                                 |
| outer membrane porin protein                       | <i>yfaZ</i> | <  | > | <i>nudI</i> | predicted NUDIX hydrolase                            |
| CPS-53 (KpLE1) prophage protein                    | <i>yfdP</i> | >  | > | <i>yfdQ</i> | CPS-53 (KpLE1) prophage protein                      |
| Mur-NAC cell wall regulator                        | <i>murR</i> | <  | > | <i>murQ</i> | predicted PTS component                              |
| predicted inner membrane protein                   | <i>yfgF</i> | <  | > | <i>yfgG</i> | predicted protein                                    |
| Ile tRNA                                           | <i>ileY</i> | <  | > | <i>csiD</i> | predicted protein                                    |
| predicted protein                                  | <i>ygdR</i> | >  | > | <i>tas</i>  | NADP(H)-dependent oxidoreductase                     |
| arabinose transporter                              | <i>araE</i> | <  | < | <i>kduD</i> | 2-deoxy-D-gluconate 3-dehydrogenase                  |
| predicted transporter                              | <i>yqeG</i> | >  | > | <i>yqeH</i> | conserved protein                                    |
| ABC superfamily transporter                        | <i>ygiS</i> | <  | < | <i>mqsA</i> | MqsRA T-AT antitoxin regulator                       |
| KpLE2 phage IS2 transposase InsAB'                 | <i>insD</i> | >  | > | <i>yqiH</i> | predicted periplasmic pilin chaperone                |
| predicted glycogen synthesis protein               | <i>glgS</i> | <  | > | <i>yqiJ</i> | predicted inner membrane protein                     |
| <i>arg</i> operon transcriptional dual regulator   | <i>argR</i> | >  | > | <i>yhcN</i> | conserved protein                                    |
| predicted outer membrane protein                   | <i>yhdV</i> | >  | > | <i>yhdX</i> | predicted amino-acid transporter                     |
| DNA-binding transcriptional dual regulator         | <i>gadX</i> | <  | < | <i>gadA</i> | glutamate decarboxylase A                            |
| predicted glutathione S-transferase                | <i>yibF</i> | <  | > | <i>rhsA</i> | <i>rhsA</i> element core protein RshA                |
| bifunctional enzyme/transcriptional regulator      | <i>yifB</i> | <  | > | <i>ilvL</i> | <i>ilvG</i> operon leader peptide                    |
| <i>ilvG</i> operon leader peptide                  | <i>ilvL</i> | >  | > | <i>ilvM</i> | acetolactate synthase II                             |
| predicted endonuclease                             | <i>yihG</i> | <  | > | <i>polA</i> | DNA polymerase I                                     |
| predicted acetyltransferase                        | <i>yiiD</i> | >  | > | <i>yiiE</i> | transcriptional regulator                            |
| glyoxylate bypass operon regulator                 | <i>icIR</i> | <  | > | <i>meth</i> | homoCys-methyltetrahydrofolate transmethylase        |
| biodegradative arginine decarboxylase              | <i>adiA</i> | <  | < | <i>melR</i> | DNA-binding transcriptional dual regulator           |
| PAPS-bisphosphate nucleotidase                     | <i>cysQ</i> | >  | > | <i>ytfI</i> | predicted protein                                    |
| trehalose transport catabolism regulator           | <i>treR</i> | <  | > | <i>mgtA</i> | magnesium transporter                                |
| KpLE2 RNAP sigma 19 factor                         | <i>fecl</i> | <  | > | <i>insA</i> | KpLE2 phage IS1 repressor protein InsA               |
| conserved protein                                  | <i>yjhX</i> | <  | < | <i>yjhS</i> | conserved protein                                    |
| N-acetylnuraminic acid OM channel protein          | <i>nanC</i> | <  | > | <i>fimB</i> | tyrosine recombinase/inversion <i>fimA</i> regulator |
| tyrosine recombinase/ <i>fimA</i> on-off regulator | <i>fimB</i> | >  | > | <i>fimE</i> | tyrosine recombinase/inversion <i>fimA</i> regulator |
| predicted protein                                  | <i>yjiC</i> | <  | > | <i>yjiD</i> | DNA replication/recombination/repair protein         |
| Total no. binding sites                            |             | 56 |   |             |                                                      |
| Total no. regulatory targets                       |             | 80 |   |             |                                                      |
